# Supplementary material for: Global Warming, Advancing Bloom and Evidence for Pollinator Plasticity from Long-Term Bee Emergence Monitoring
Source: MDPI journal article supplement (doi:10.3390/insects12050457), 2021-05-16
Supplement: s1 [file s1]

Annual date for first flowering by select woodland perennial wildflowers from Mohonk Reserve, NY USA, 1970-2006. Days since January 1. Data from Cook *et al.* 2008

| Genus              | Min. days | Median days | Max days | Range in days |
|--------------------|-----------|-------------|----------|---------------|
| <i>Caltha</i>      | 101       | 115         | 129      | 28            |
| <i>Erythronium</i> | 96        | 110         | 125      | 29            |
| <i>Hedysotis</i>   | 107       | 120         | 135      | 28            |
| <i>Hepatica</i>    | 86        | 105         | 124      | 38            |
| <i>Polygala</i>    | 114       | 128         | 139      | 25            |
| <i>Sanguinaria</i> | 92        | 107         | 118      | 26            |
| <i>Thalictrum</i>  | 102       | 115         | 127      | 25            |
| <i>Trillium</i>    | 108       | 119         | 133      | 25            |

Annual date for first flowering by select montane perennial wildflowers from Rocky Mountain Biological Lab, Crested Butte, Colorado USA, 1975-2000. Days since January 1. Data provided by David Inouye.

| Species                     | Min. days | Median days | Max days | Range in days |
|-----------------------------|-----------|-------------|----------|---------------|
| <i>Delphinium barbeyi</i>   | 162       | 186         | 218      | 56            |
| <i>Heterotheca villosa</i>  | 168       | 190         | 219      | 51            |
| <i>Mertensia fusiformis</i> | 116       | 140         | 166      | 50            |
